# Supplementary material
Source: Springer Nature journal article supplement (https://www.springermedizin.de/resource/supplementary/12963_2011_166_MOESM4_ESM.pdf/9572798)

**Figure 4. The relative contribution of the 3 delays leading up to child death in Dodowa HDSS, Ghana, n =40**

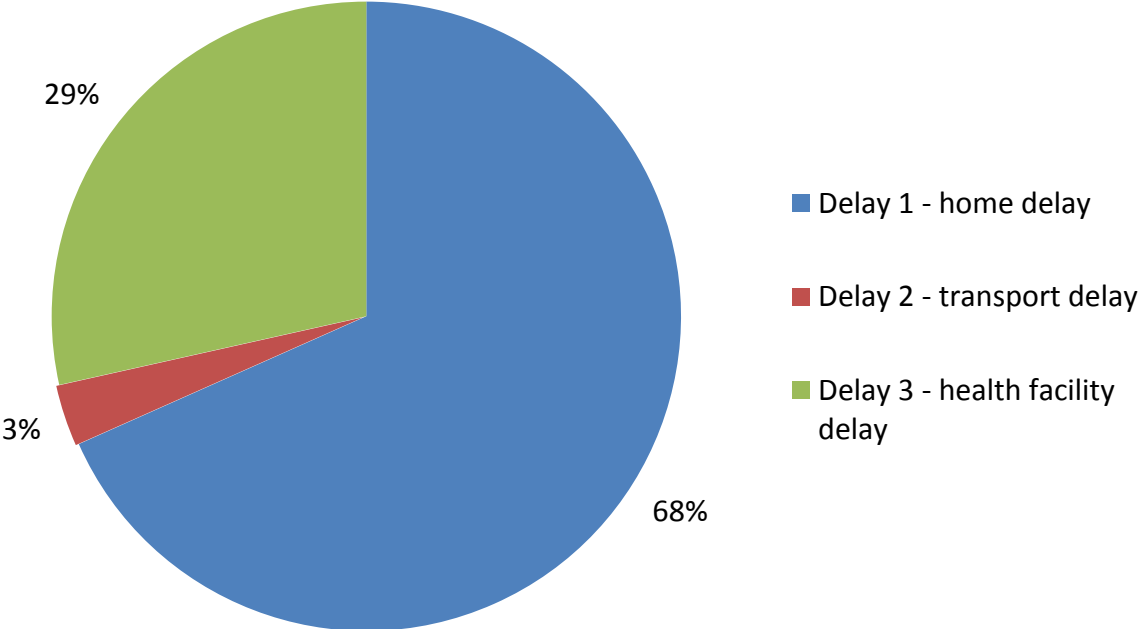

Supplement: MOESM4 [file 9572798]
